# Supplementary material for: Fracture Healing in 37 Dogs and Cats with Implant Failure after Surgery (2013–2018)
Source: MDPI journal article supplement (doi:10.3390/ani13091549), 2023-05-05
Supplement: s1 [file s1]

**Table S1: Area moment of inertia for AO/ASIF plates**

| Implant                                         | Breadth [b] × Height [h] (mm) | Area moment of inertia [I] (mm <sup>4</sup> ) | Suitable screw sizes (mm)                            |
|-------------------------------------------------|-------------------------------|-----------------------------------------------|------------------------------------------------------|
| 1.3mm titanium orbital rim plate                | 3.3 × 0.5                     | 0.03                                          | 1.3                                                  |
| 1.5mm straight plate                            | 3.8 × 0.8                     | 0.16                                          | 1.5                                                  |
| 1.5mm LCP                                       | 4.25 × 1.0                    | 0.35                                          | 1.5                                                  |
| 1.5 (2.0) Cuttable plate with spaces (VI)       | 5.0 × 1.5                     | 1.4                                           | 1.5, 2.0                                             |
| 1.5 (2.0) mm Veterinary mini T plate            | 5.0 × 1.5                     | 1.4                                           | 1.5, 2.0                                             |
| 1.5 (2.0) mm Cut-To-Length plate (Synthes)      | 7.0 × 1.0                     | 0.58                                          | 1.5, 2.0                                             |
| 2.0mm Straight Plate                            | 5.0 × 1.0                     | 0.45                                          | 1.5, 2.0                                             |
| 2.0 mm DCP (4–6 hole)                           | 5.0 × 1.0                     | 0.42                                          | 2.0                                                  |
| 2.0 mm DCP (6–8 hole)                           | 5.0 × 1.5                     | 1.4                                           | 2.0                                                  |
| 1.5 (2.0) mm LC-DCP or LCP (4–7 holes)          | 5.5 × 1.2                     | 0.79                                          | 1.5, 2.0                                             |
| 1.5 (2.0) mm LC-DCP or LCP (6–14 holes)         | 5.5 × 1.5                     | 1.55                                          | 1.5, 2.0                                             |
| 2.0 (2.7) mm Cut-To-Length plate                | 7.0 × 1.5                     | 2.0                                           | 2.0, 2.4, 2.7                                        |
| 2.0 (2.4) mm LC-DCP or LCP (4–8 holes)          | 6.5 × 1.7                     | 2.66                                          | 2.0, 2.4                                             |
| 2.0 (2.4) mm LC-DCP or LCP (8–14 holes)         | 6.5 × 2.0                     | 4.33                                          | 2.0, 2.4                                             |
| 2.7 mm DCP (4–6 hole)                           | 8.0 × 2.0                     | 5.3                                           | 2.7                                                  |
| 2.7 mm DCP (7–12 hole)                          | 8.0 × 2.5                     | 10.4                                          | 2.7                                                  |
| 2.7 mm Reconstruction plate                     | 5.0 × 2.7                     | 8.2                                           | 2.7                                                  |
| 2.7 mm LC-DCP or LCP                            | 7.5 × 2.6                     | 10.99                                         | 2.7                                                  |
| 2.7 (3.5) mm Veterinary T plate                 | 9.2 × 2.0                     | 6.1                                           | 2.7, 3.5, 4.0*                                       |
| 3.5 mm LC-DCP or LCP                            | 11 × 3.3                      | 32.94                                         | 3.5, 4.0*                                            |
| 3.5 mm Broad DCP                                | 12.0 × 3.6                    | 46.7                                          | 3.5, 4.0*                                            |
| 3.5 mm Broad LC-DCP or LCP                      | 13.5 × 4.2                    | 83.35                                         | 3.5, 4.0*                                            |
| 3.5 mm Reconstruction plate                     | 6.0 × 2.8                     | 11.0                                          | 3.5, 4.0*                                            |
| 3.5 mm prebent Reconstruction plate             | 6.0 × 3.6                     | 23.3                                          | 3.5, 4.0*                                            |
| 4.5 mm Reconstruction plate                     | 7.0 × 2.8                     | 12.8                                          | 4.5, 5.5, 6.5*                                       |
| 4.5 mm T plate                                  | 17.0 × 2.0                    | 11.3                                          | 4.5, 5.5, 6.5*                                       |
| 4.5 mm Narrow DCP (2–11 hole)                   | 12.0 × 3.8                    | 54.8                                          | 4.5                                                  |
| 4.5mm Broad DCP (6–26 hole)                     | 16.0 × 4.8                    | 147.5                                         | 4.5                                                  |
| 4.5 mm narrow LC-DCP or LCP                     | 13.5 × 4.2                    | 83.35                                         | 4.0 <sup>#</sup> , 4.5, 5.0 <sup>#</sup> , 5.5, 6.5* |
| 4.5 mm Broad LC-DCP or LCP                      | 17.5 × 5.2                    | 205.05                                        | 4.0 <sup>#</sup> , 4.5, 5.0 <sup>#</sup> , 5.5, 6.5* |
| 4.5 mm Narrow limb lengthening plate (8 hole)   | 12 × 3.8                      | 54.9                                          | 4.5, 6.5* in end holes                               |
| 4.5 mm Broad limb lengthening plate (8–10 hole) | 16 × 4.8                      | 147.5                                         | 4.5, 6.5* in end holes                               |
| 5.5 mm Broad LCP                                | 17.5 × 6.0                    | 315.0                                         | 4.0 <sup>#</sup> , 4.5, 5.0 <sup>#</sup> , 5.5, 6.5* |

Note: AO/ASIF – Arbeitsgemeinschaft für Osteosynthesefragen/Association for the Study of Internal Fixation. Area moment of inertia  $I = bh^3/12$  (b = plate dimension parallel to axis around which moment area of inertia is being calculated, h = plate dimension parallel to the applied bending load). The calculations assume a perfect rectangular cross section for plates. DCP, dynamic compression plate; LC-DCP, limited contact dynamic compression plate; LCP, locking compression plate; VI, Veterinary Instrumentation. \*Cancellous screws, <sup>#</sup>locking screws.
